# Supplementary material
Source: PubMed Central journal article supplement (PMC3432654)

A)

incubated TMR-S-S-TAT

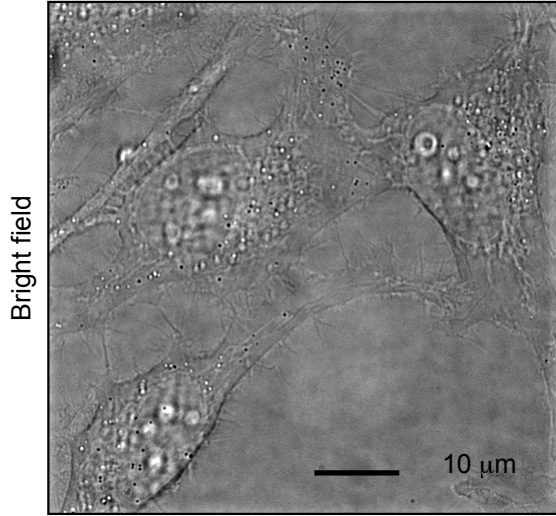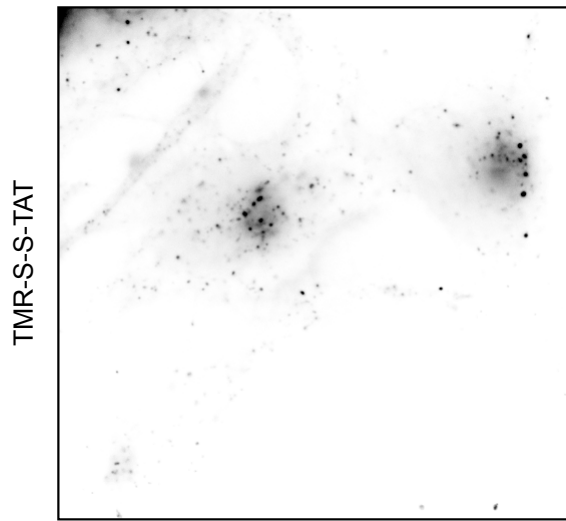

B)

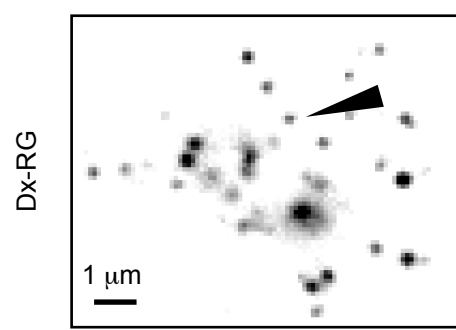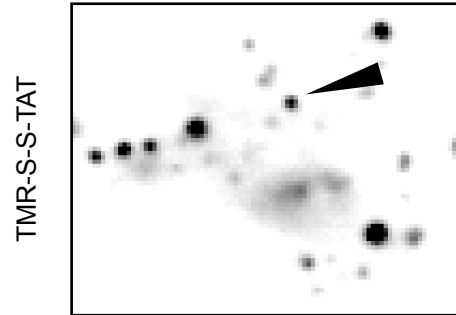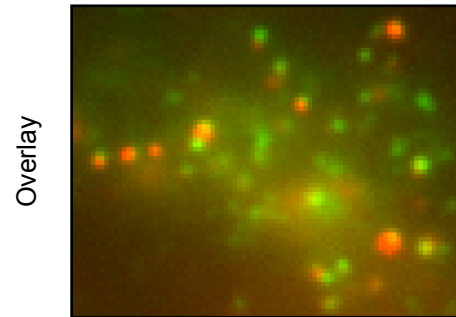

Figure S2

Supplement: NIHMS392656-supplement-02.pdf [file NIHMS392656-supplement-02.pdf]

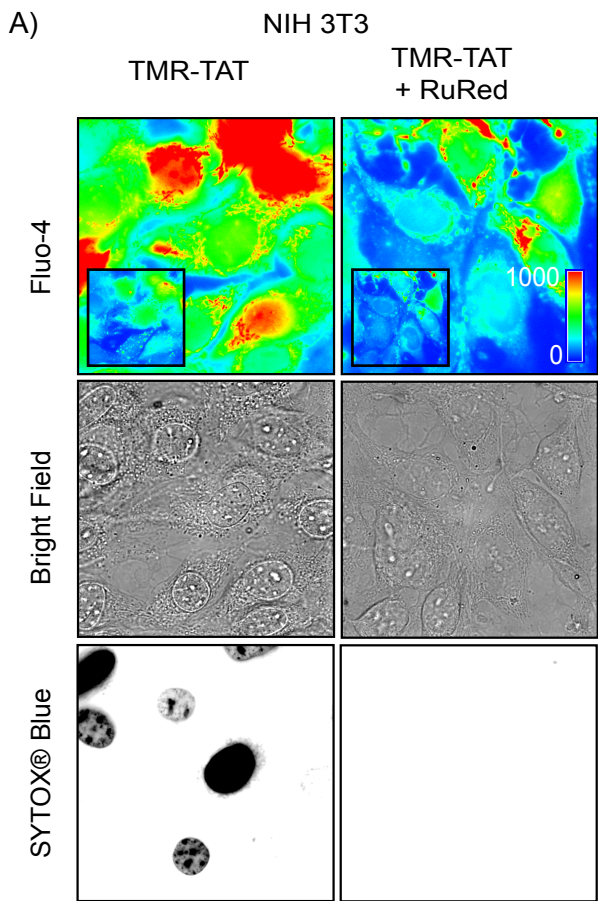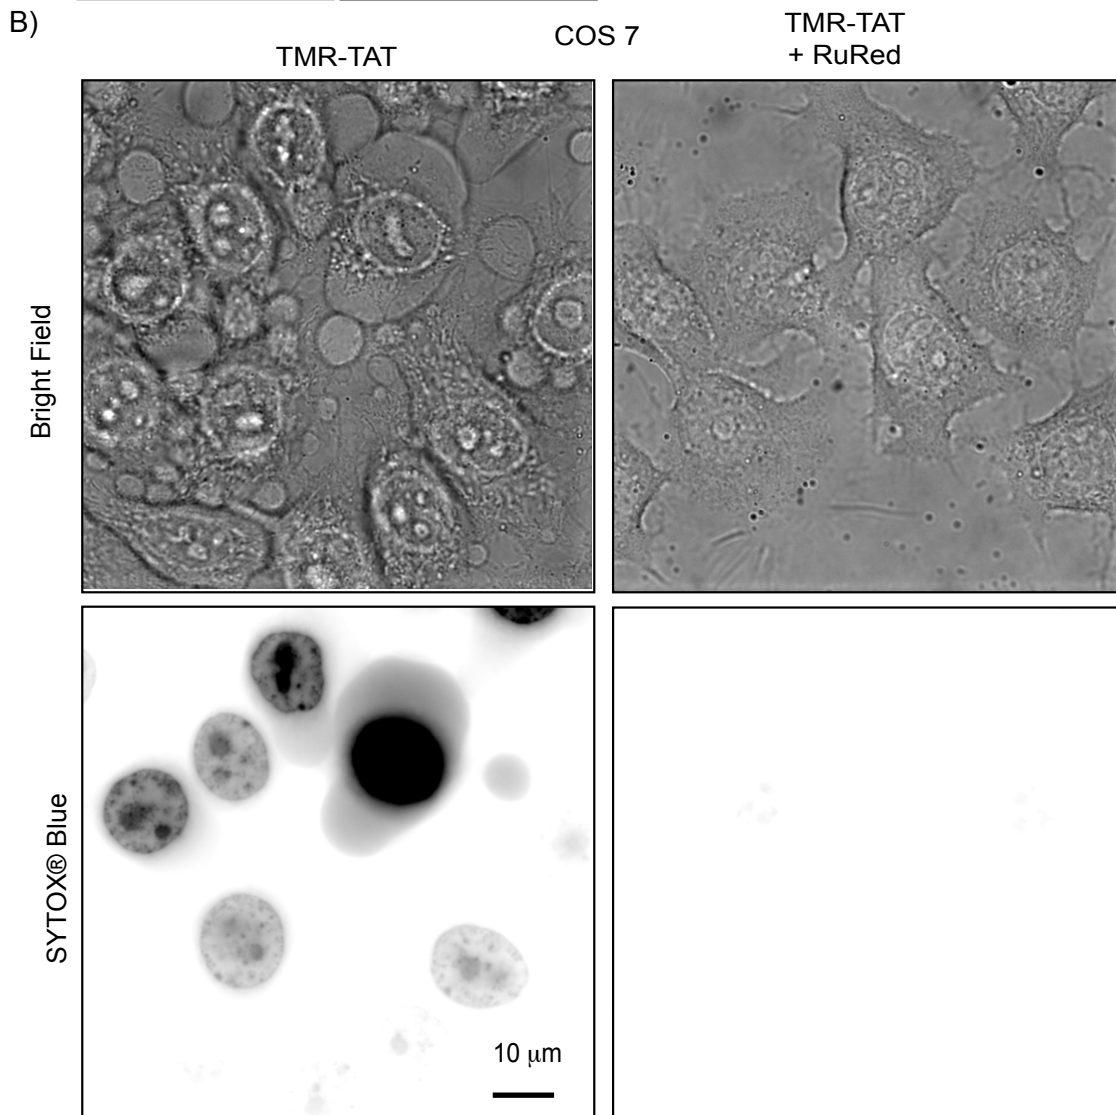

Figure S6

Supplement: NIHMS392656-supplement-06.pdf [file NIHMS392656-supplement-06.pdf]
